# Supplementary material
Source: publisher figshare collection journal article supplement (https://acs.figshare.com/ndownloader/files/10816973)
Supplement: Supplementary file 1 [file 10816973]

## Supporting Information

### Cooperative Assembly of Magneto-nanovesicles with Tunable Wall Thickness and Permeability for MRI-guided Drug Delivery

*Kuikun Yang,<sup>†,#</sup> Yijing Liu,<sup>†,#</sup> Yi Liu,<sup>†</sup> Qian Zhang,<sup>†</sup> Chuncai Kong,<sup>†</sup> Chenglin Yi,<sup>†</sup> Zijian Zhou,<sup>‡</sup> Zhantong Wang,<sup>‡</sup> Guofeng Zhang,<sup>‡</sup> Yang Zhang,<sup>§</sup> Niveen M. Khashab,<sup>§,\*</sup> Xiaoyuan Chen,<sup>‡,\*</sup> and Zhihong Nie<sup>†,\*</sup>*

[†] Department of Chemistry and Biochemistry, University of Maryland College Park, Maryland 20742 (USA)

[‡] Laboratory of Molecular Imaging and Nanomedicine (LOMIN), National Institute of Biomedical Imaging and Bioengineering (NIBIB), National Institutes of Health, Maryland 20892 (USA)

[§] Smart Hybrid Materials (SHMs) Lab, Department of Chemical Sciences and Engineering, Advanced Membranes and Porous Materials Center, King Abdullah University of Science and Technology (KAUST), Thuwal 23955-6900 (Kingdom of Saudi Arabia)

Corresponding author E-mails: [znjie@umd.edu](mailto:znjie@umd.edu), [shawn.chen@nih.gov](mailto:shawn.chen@nih.gov), [niveen.khashab@kaust.edu.sa](mailto:niveen.khashab@kaust.edu.sa)

<sup>#</sup>These authors contributed equally.

## Synthesis of maleimide-terminated dopamine

Maleimide-terminated dopamine was synthesized by the carbodiimide reaction following a previously reported procedure.<sup>[1]</sup> Briefly, Dopamine hydrochloride (1.92 g, 0.010 mol) and triethylamine (1.28 g, 0.013 mol) were dissolved in anhydrous methanol (10 ml) and then added dropwise to a solution of 6-maleimidohexanoic acid N-hydroxysuccinimide ester (2.6 g, 0.008 mol) in anhydrous CH<sub>2</sub>Cl<sub>2</sub> (100 ml). The mixture was stirred vigorously for 48 h under nitrogen and washed three times with HCl (0.5M, 80 ml). The solvent was evaporated and the crude product was purified by column chromatography (SiO<sub>2</sub>/CH<sub>2</sub>Cl<sub>2</sub>/MeOH 10:1).

## Supplementary Figures

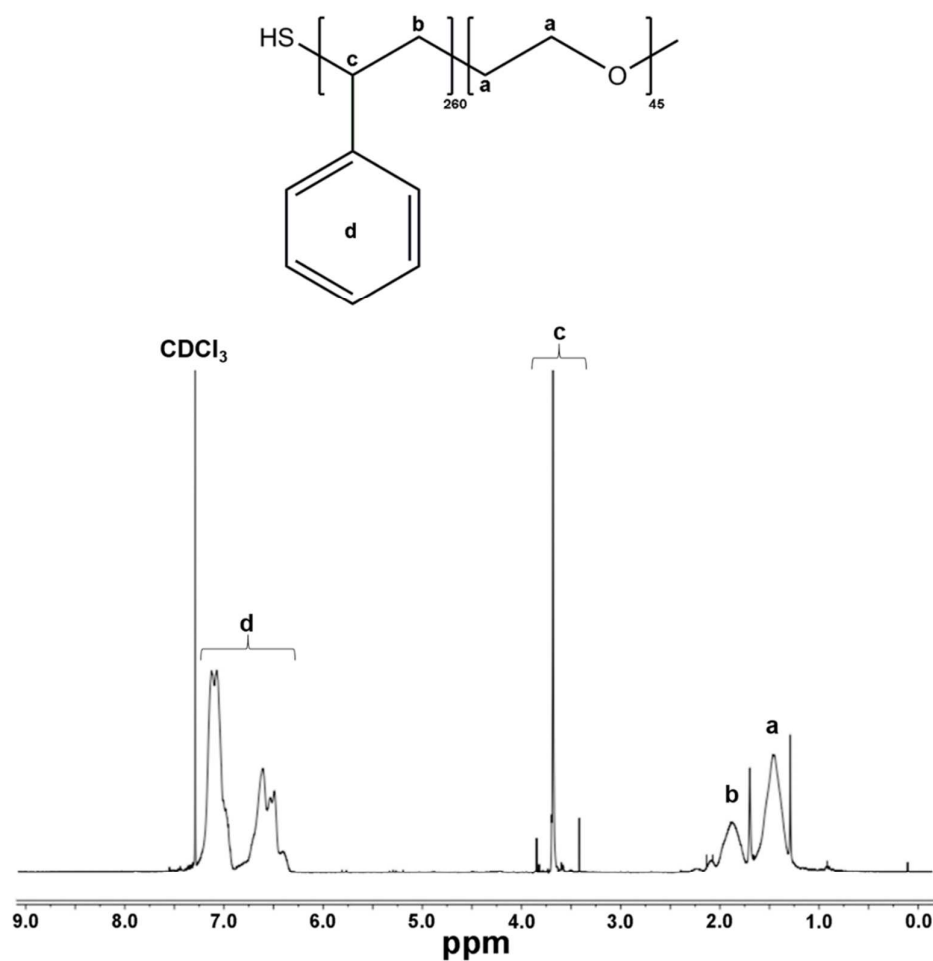

**Figure S1.** <sup>1</sup>H NMR spectrum of PEO-*b*-PS.

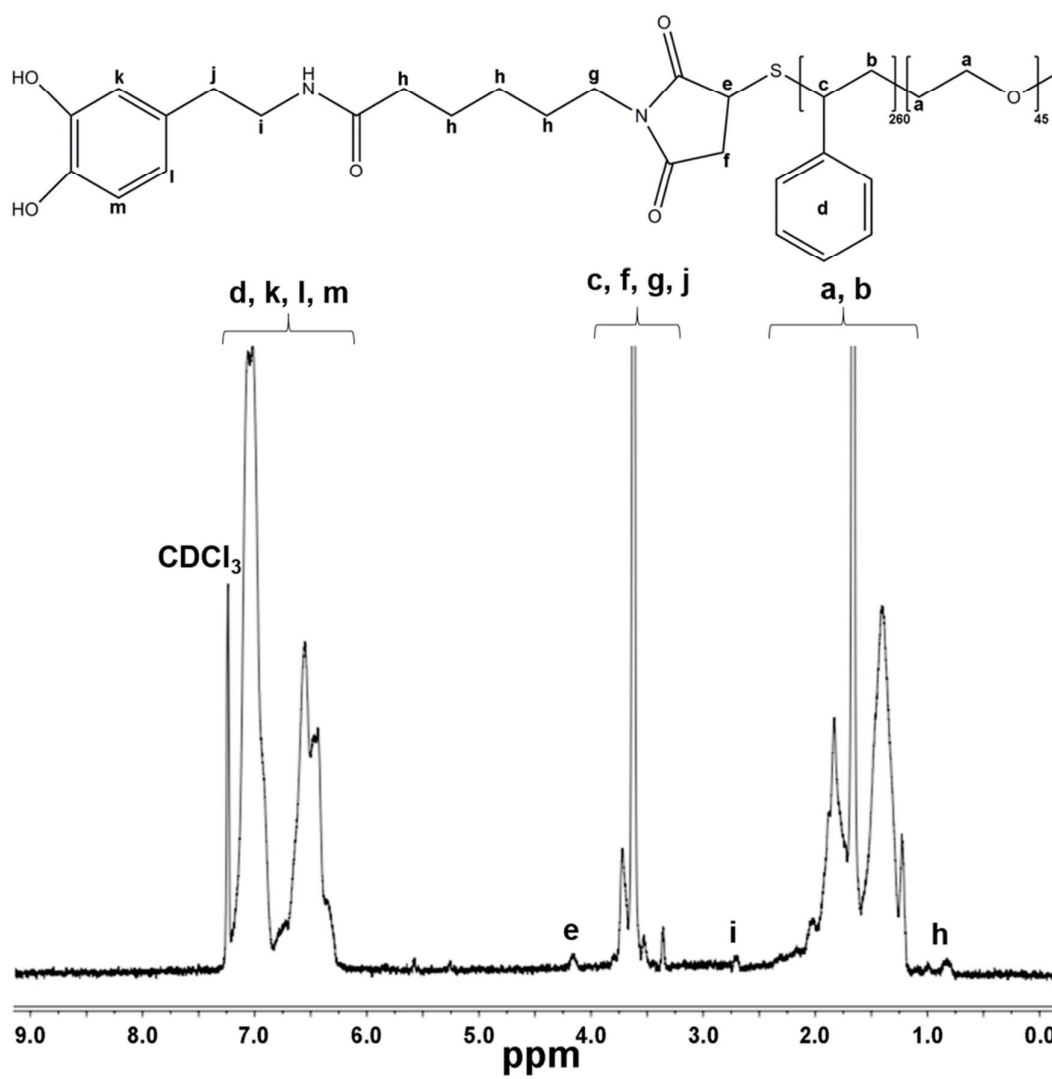

**Figure S2.** <sup>1</sup>H NMR spectrum of dopamine-terminated PEO-*b*-PS.

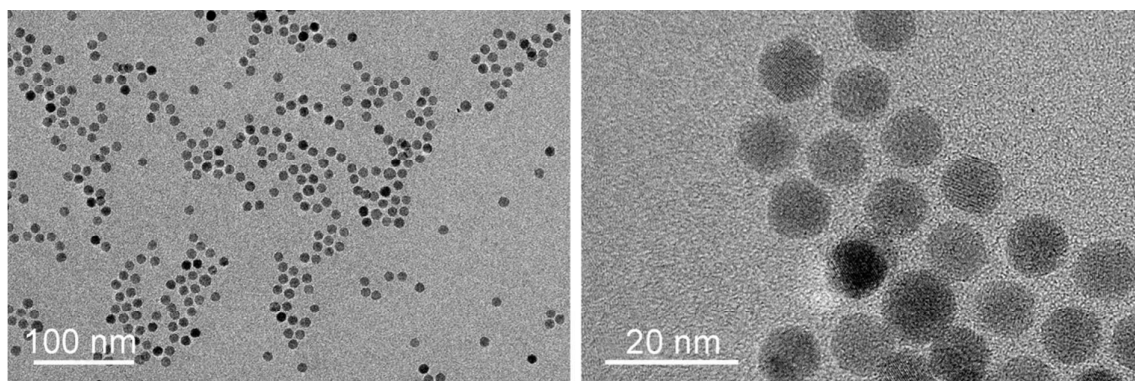

**Figure S3.** TEM images of SPIONs before the self-assembly.

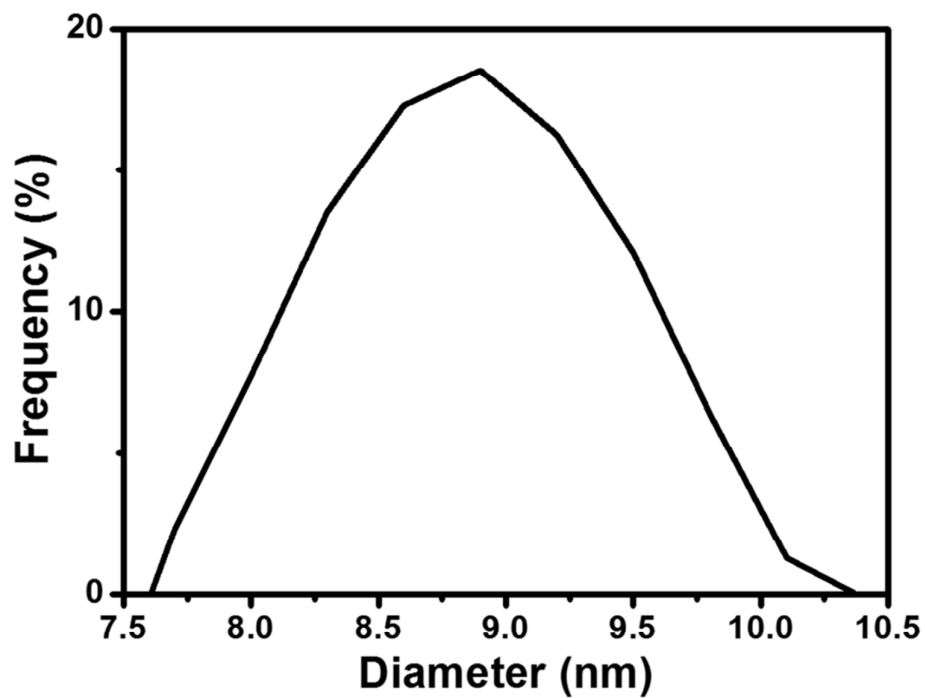

**Figure S4.** Size distribution of SPIONs from TEM analysis.

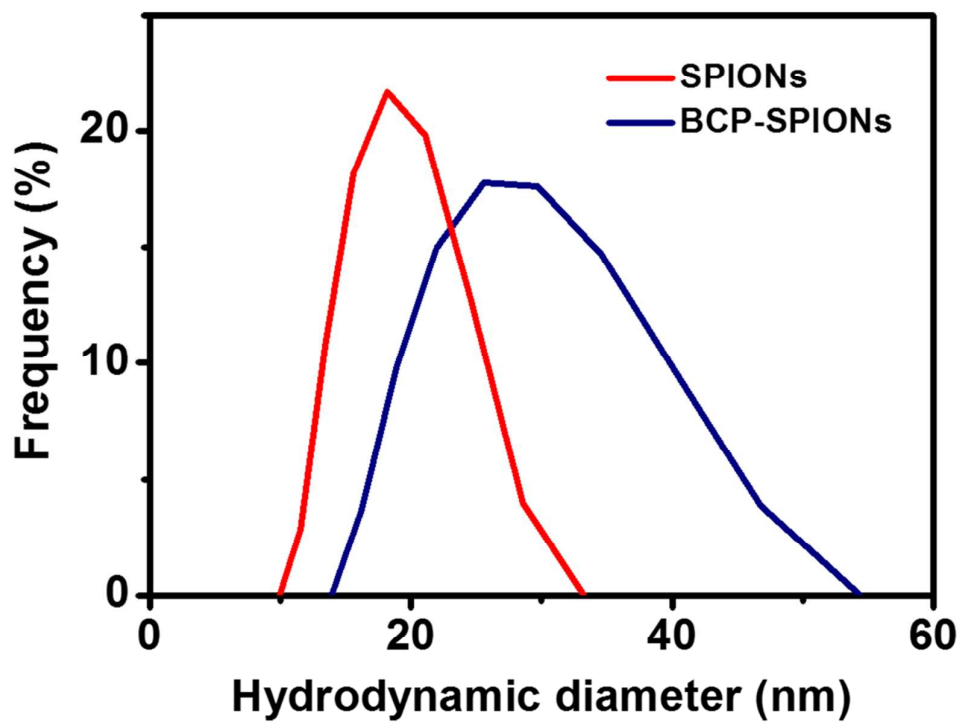

**Figure S5.** Dynamic light scattering analysis of the hydrodynamic diameter of SPIONs in THF before (red) and after (blue) the grafting of amphiphilic PEO-*b*-PS on the surface.



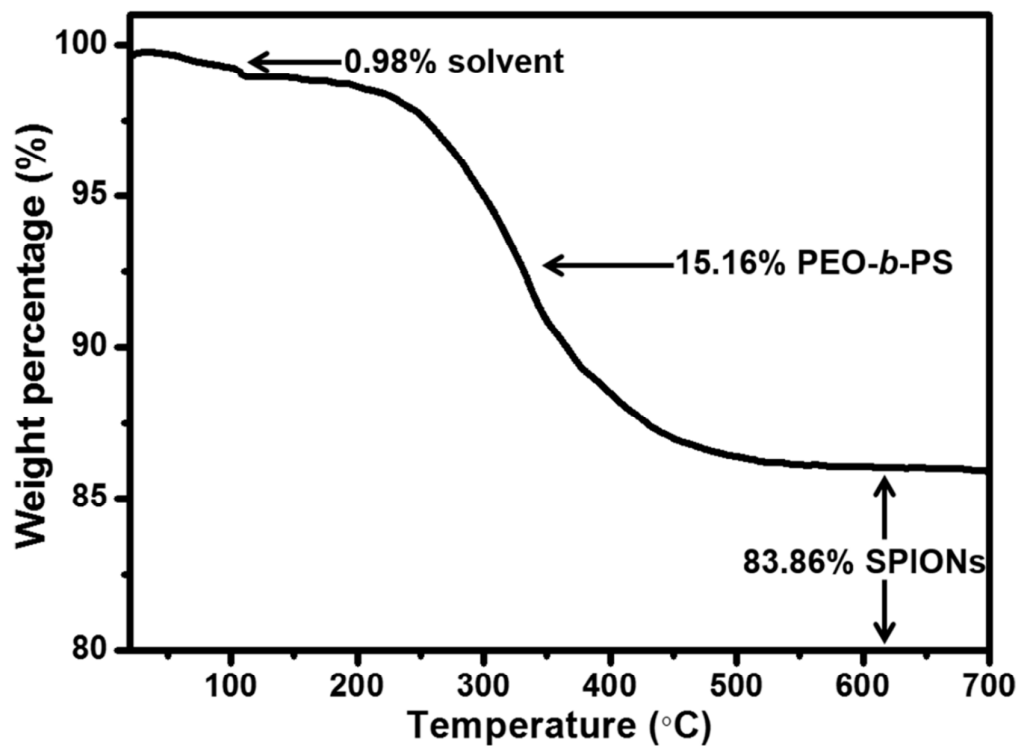

**Figure S6.** TGA results of PEO-*b*-PS-tethered SPIONs.

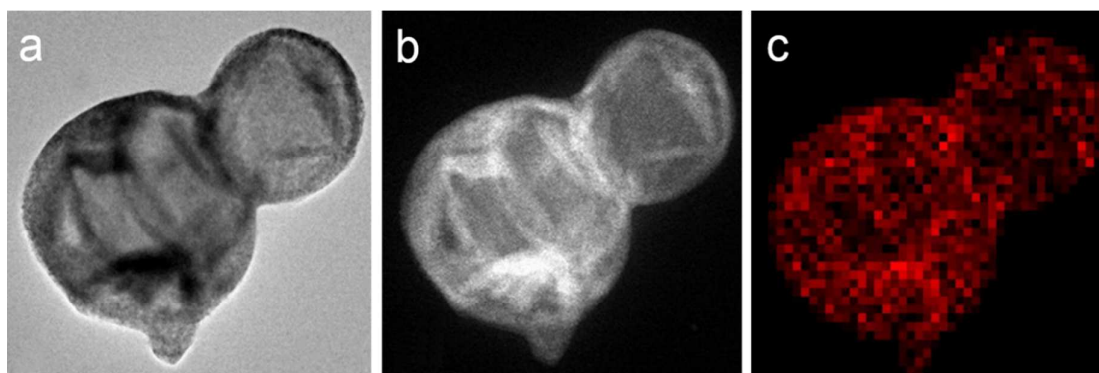

**Figure S7.** (a,b) STEM images and (c) the corresponding EDS element mapping (Fe) image of MuMVs.

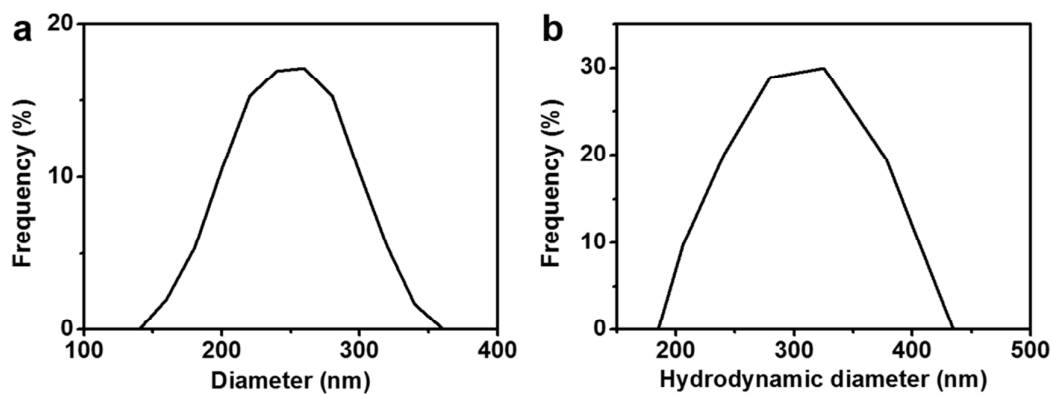

**Figure S8.** (a) TEM analysis of the diameter of MuMVs dried on TEM grid and (b) dynamic light scattering measurement of the diameter of MuMVs dispersed in water.

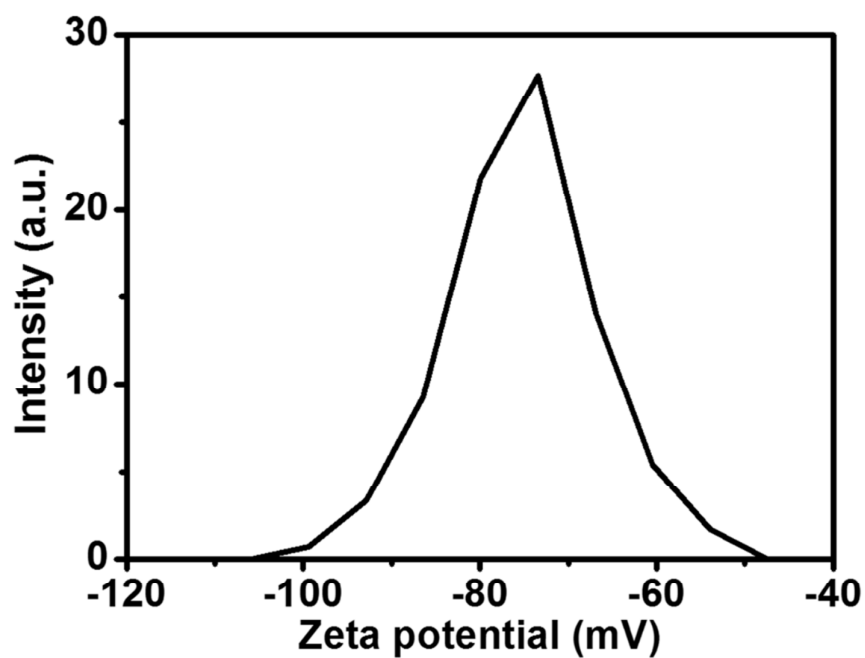

**Figure S9.** Zeta potential measurement of MuMVs indicates that the MuMVs are negatively charged due to the presence of carboxyl groups in PS-*b*-PAA.

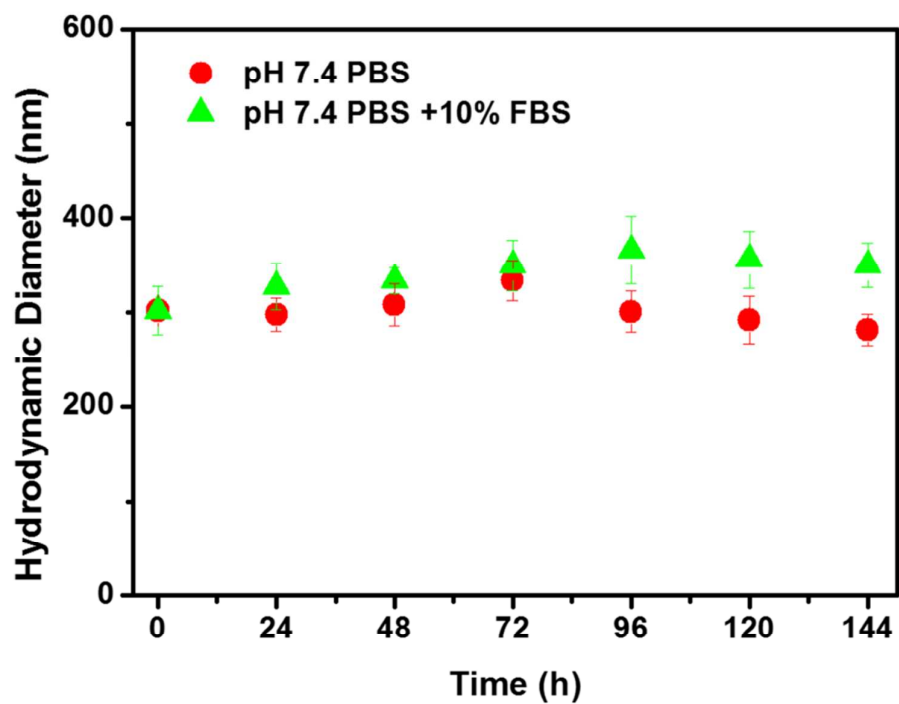

**Figure S10.** Hydrodynamic size distribution of MuMVs in PBS and PBS supplemented with 10% FBS

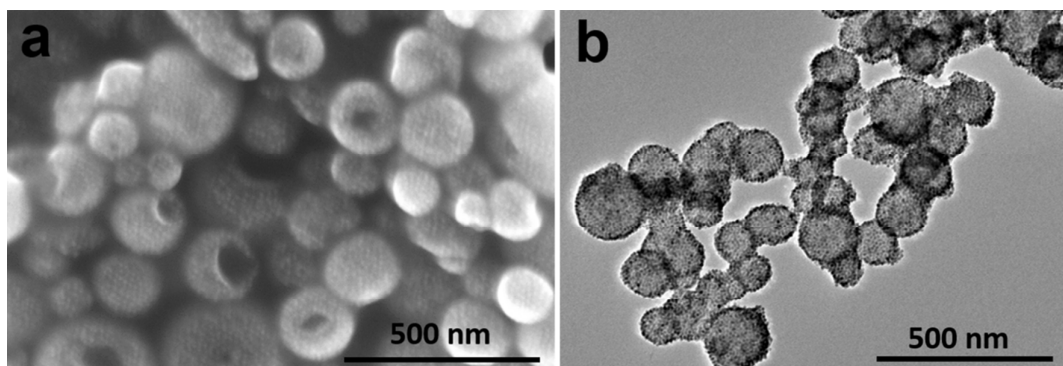

**Figure S11.** (a) SEM and (b) TEM images of MoMVs. The occasional buckling and collapse of the membrane indicates the formation of hollow vesicular structures

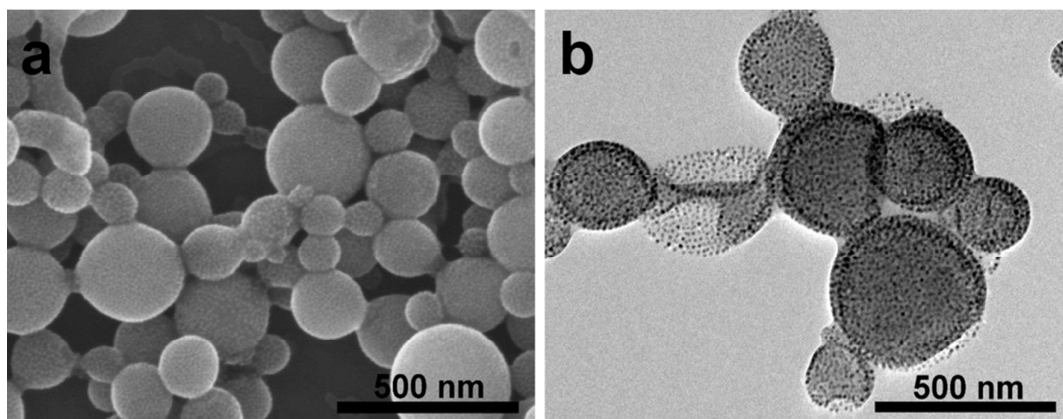

**Figure S12.** (a) SEM and (b) TEM images of DoMVs. The wrinkling and buckling of the membrane indicates the formation of hollow vesicular structures.

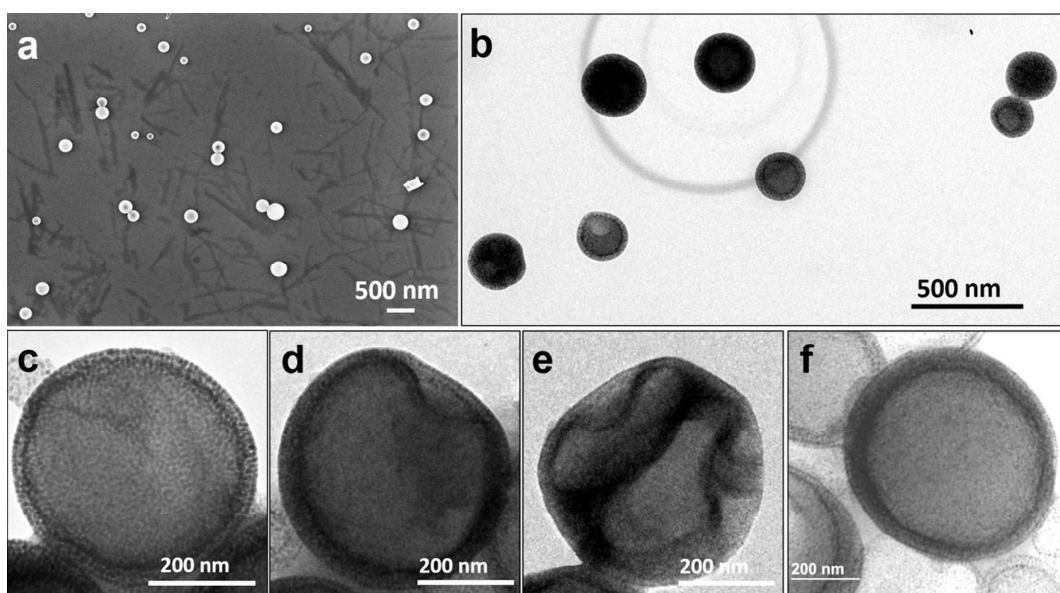

**Figure S13.** (a) SEM and (b-f) TEM images of MuMVs. The wrinkling and buckling of the membrane further indicates the formation of hollow vesicular structures.

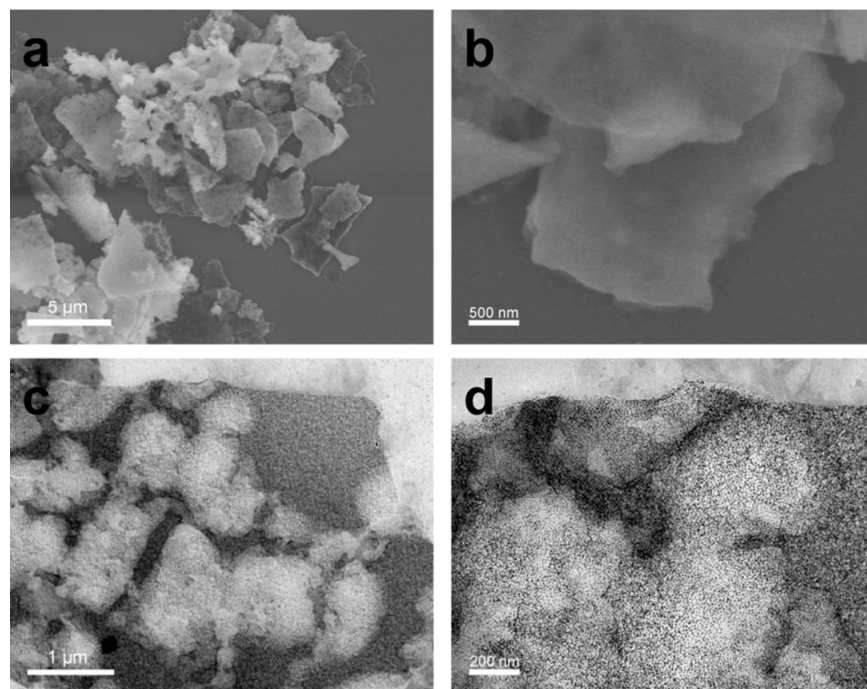

**Figure S14.** Representative (a,b) SEM and (c,d) TEM images of magnetic aggregates.

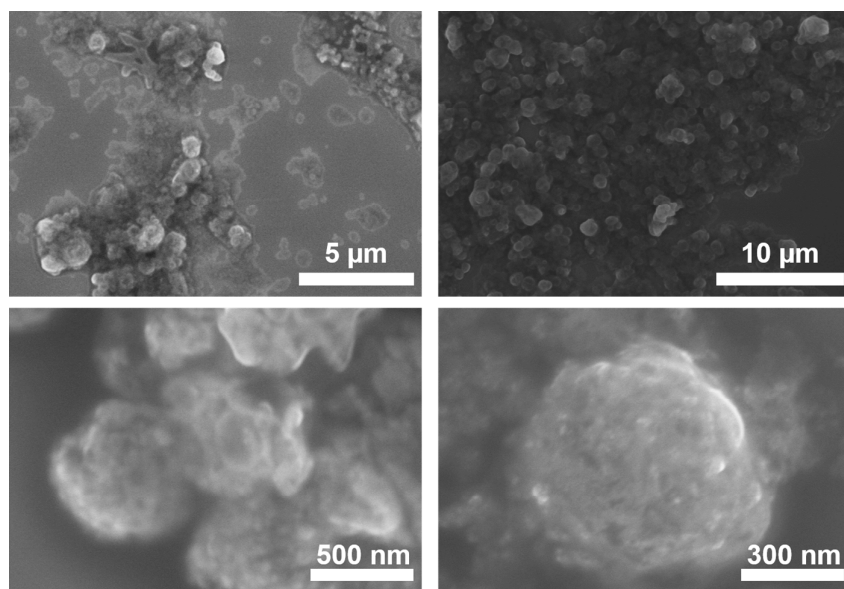

**Figure S15.** Representative SEM images of irregular aggregates assembled from a mixture of PS-b-PEO grafted SPIONs and free PS-b-PEO. When PS-b-PAA was replaced by PS-b-PEO without affinity to the surface of SPIONs, the assembly did not produce MVs with tunable layers of SPIONs in the membranes.

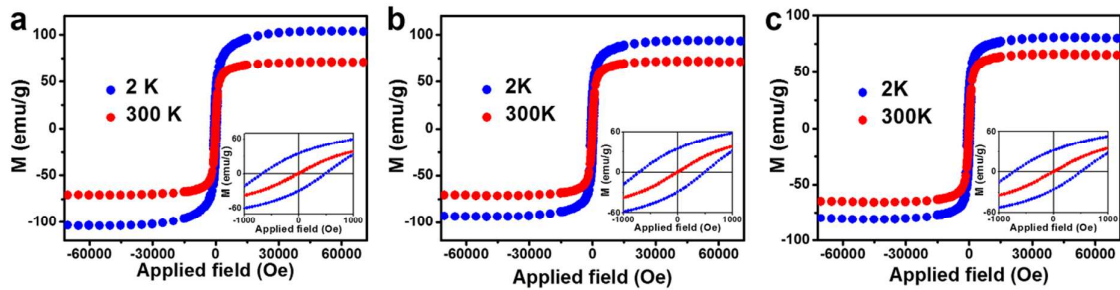

**Figure S16.** Hysteresis curves of (a) SPIONs (b) MoMVs and (c) DoMVs measured at 300 and 2 K.

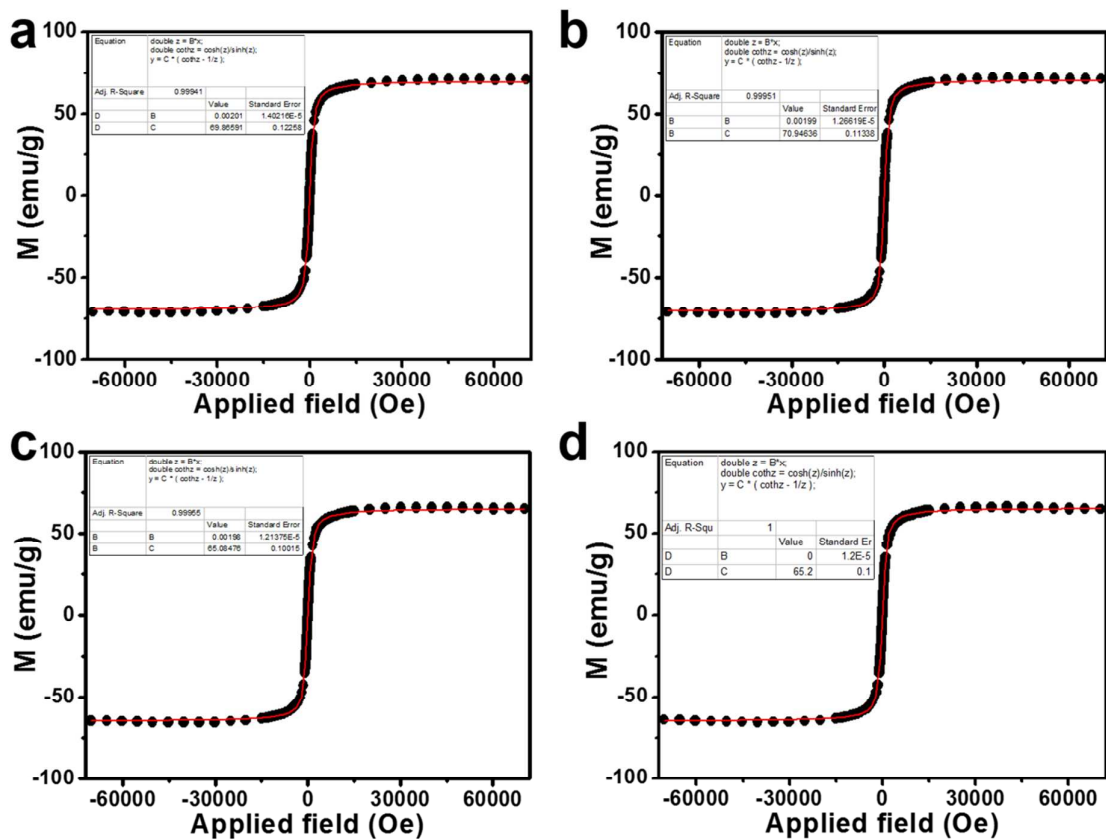

**Figure S17.** The magnetization of (a) individual SPIONs, (b) SPIONs in MoMVs, (c) SPIONs in DoMVs and (d) SPIONs in MuMVs was obtained by fitting the data into the Langevin paramagnetic function.

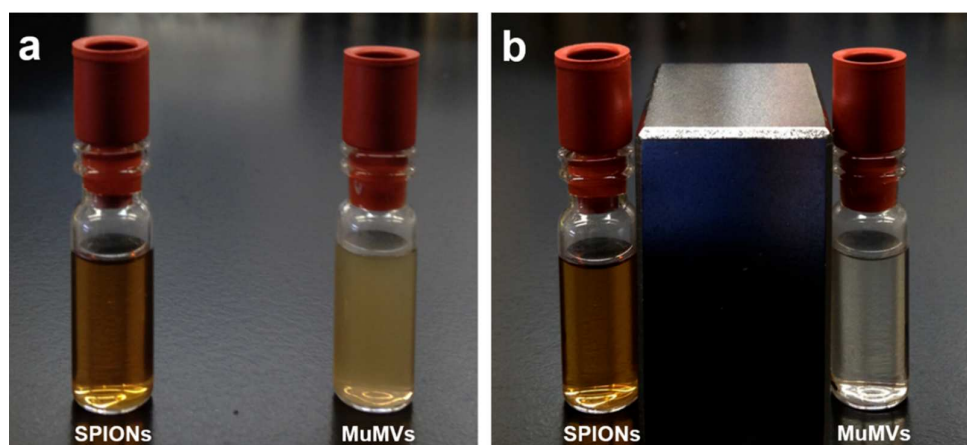

**Figure S18.** Photographs of equal concentrations of aqueous SPIONs and MuMVs dispersions (a) without magnetic field and (b) with the application of magnetic field for 2 min.

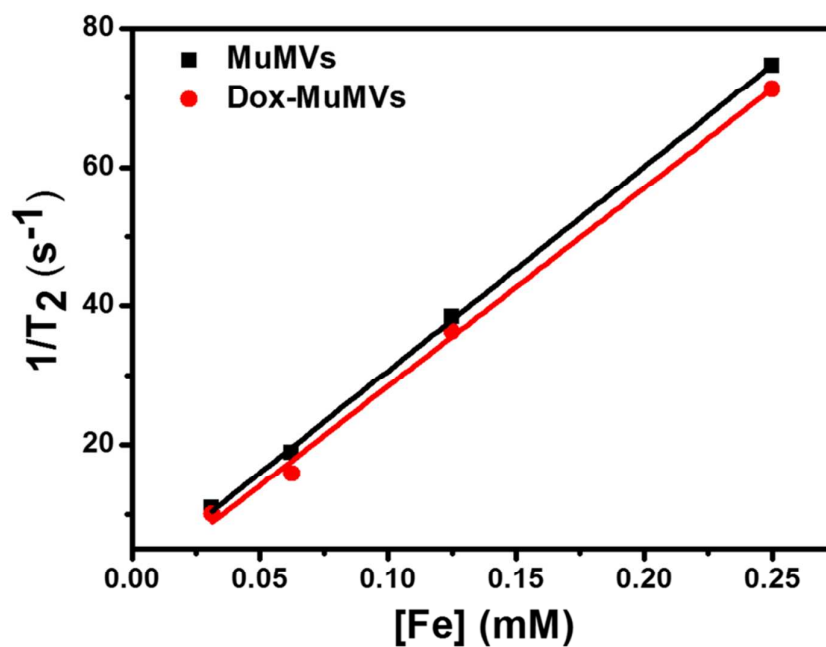

**Figure S19.** Spin-spin  $1/T_2$  relaxation rates of MuMVs before (black) and after (red) Dox loading as a function of iron concentration.



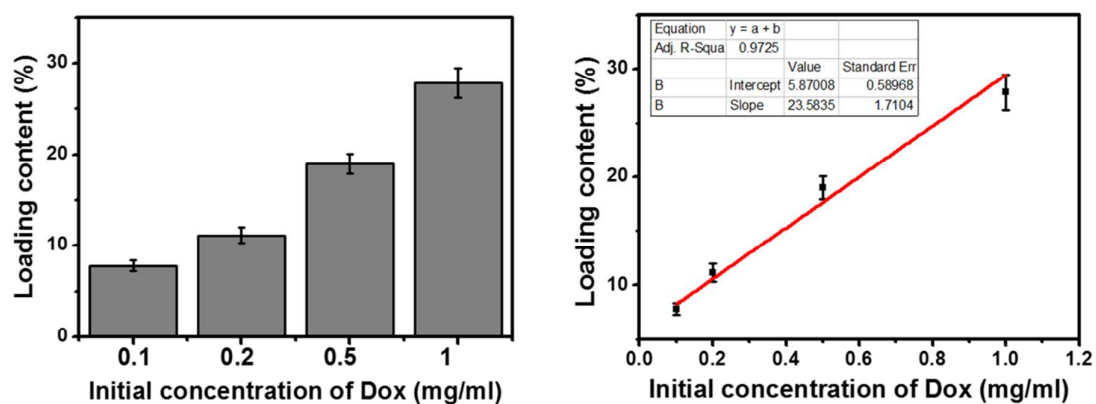

**Figure S20.** Loading content of Dox in MuMVs as a function of the initial concentrations of Dox.

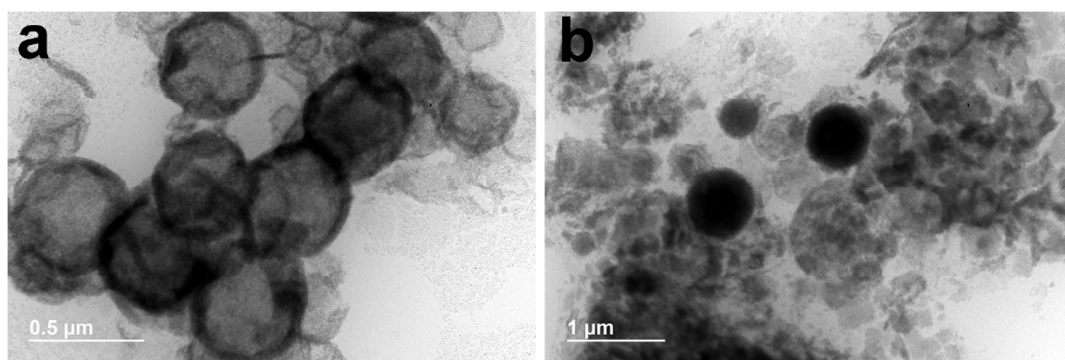

**Figure S21.** Assemblies of BCP-SPIONs by film rehydration of building blocks in Dox solutions with (a)  $1.5 \text{ mg ml}^{-1}$  and (b)  $2.0 \text{ mg ml}^{-1}$  of Dox.



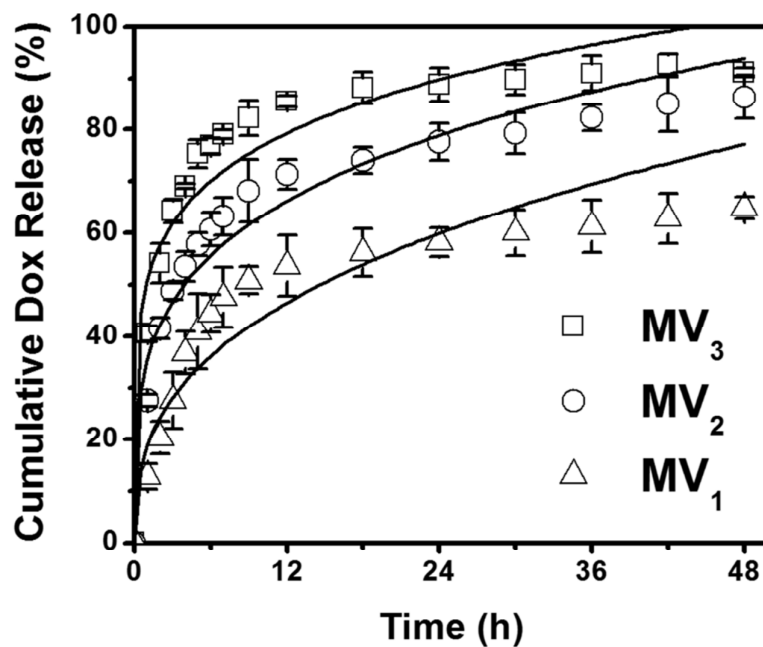

**Figure S22.** Controlled release of Dox from magnetic vesicles with different membrane thickness fitting the linear form of the empirical Korsmeyer-Peppas equation. The formation conditions of MVs are: MV<sub>1</sub> (DoMV<sub>s</sub>,  $W_{BCP}=0.8$ ), MV<sub>2</sub> (MuMV<sub>s</sub>,  $W_{BCP}=1.6$ ), and MV<sub>3</sub> (MuMV<sub>s</sub>,  $W_{BCP}=3.2$ ).

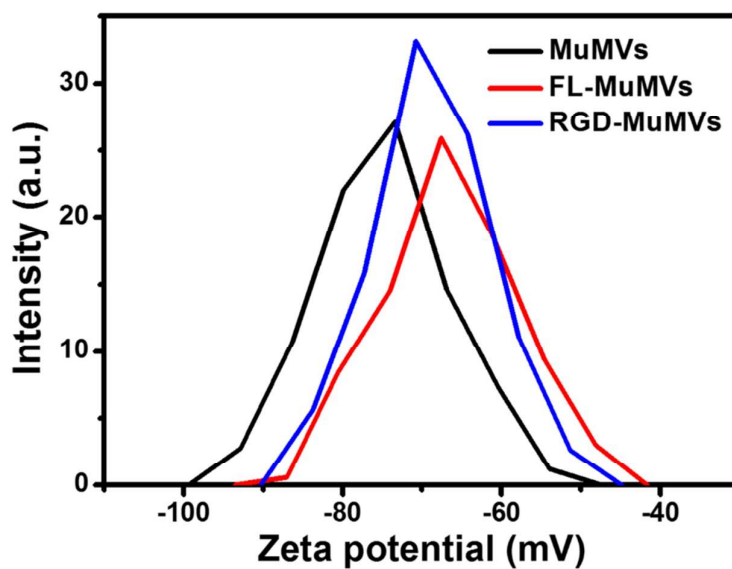

**Figure S23.** Reduced negative charge of MuMV<sub>s</sub> after conjugation with fluoresceinamine and RGD peptide.

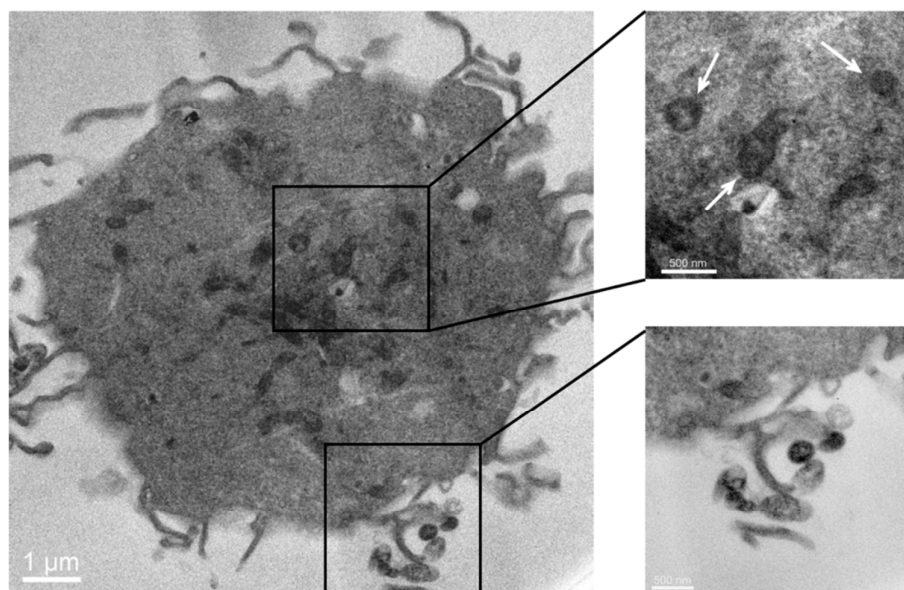

**Figure S24.** TEM images taken on U87MG cells incubated with MuMV for 1 h. White arrows denote the vesicles inside the cell.

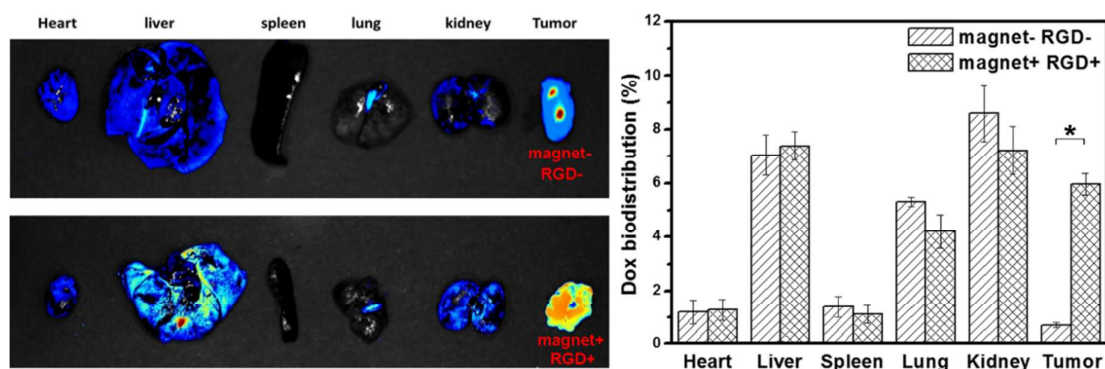

**Figure S25.** Biodistribution of Dox after intravenous injection of Dox-MuMVs (magnet-) and RGD-Dox-MuMVs (magnet+) into subcutaneous U87MG tumor-bearing mice. \*,  $p < 0.01$ .

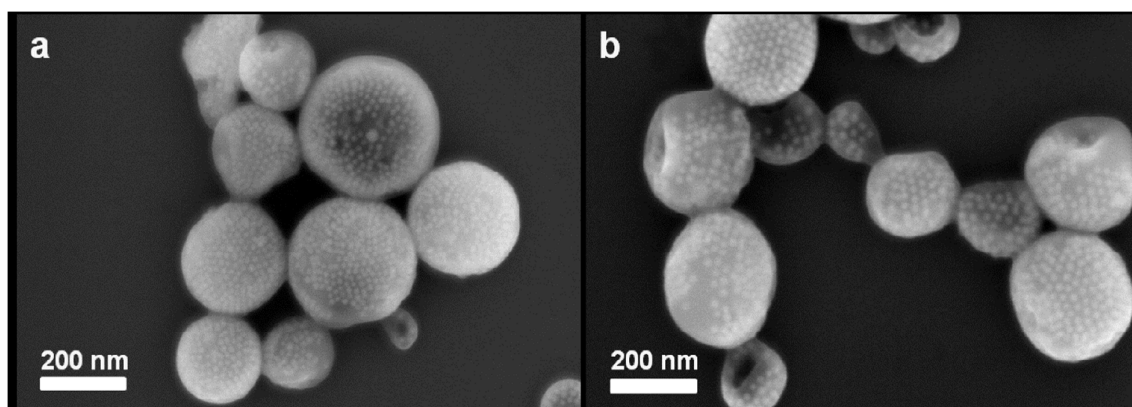

**Figure S26.** SEM images of MuMVs (a) before and (b) after filtration through a 200 nm filter.

## References

- [1] M. Mazur, A. Barras, V. Kuncser, A. Galatanu, V. Zaitzev, K. V. Turcheniuk, P. Woisel, J. Lyskawa, W. Laure, A. Siriwardena, R. Boukherroub, S. Szunerits, *Nanoscale* **2013**, 5, 2692-2702.
